# Supplementary material for: An enantioselective synthesis of the C(33)–C(37) fragment of Amphotericin B
Source: Royal Society of Chemistry journal article supplement (doi:10.1039/b305845j), 2003-01-01
Supplement: b305845j.pdf [file b305845j.pdf]

## Supporting information

An enantioselective synthesis of C(33)-C(37) fragment of Amphotericin B

Kaisa Karisalmi<sup>a)</sup>, Kari Rissanen<sup>b)</sup> Ari M. P. Koskinen<sup>a), \*</sup>

<sup>a)</sup> Helsinki University of Technology, P.O. Box 6100, Fin-02015 HUT Espoo, Finland

<sup>b)</sup> X-ray crystallography: Laboratory of Organic Chemistry, Department of Chemistry, University of Jyväskylä, P.O. Box 35, Fin-40014 University of Jyväskylä, Finland

**Table S1.** Crystal data and structure refinement for **7b**.

|                                   |                                                  |                   |
|-----------------------------------|--------------------------------------------------|-------------------|
| Identification code               | 7b                                               |                   |
| Empirical formula                 | C <sub>16</sub> H <sub>24</sub> O <sub>7</sub> S |                   |
| Formula weight                    | 360.41                                           |                   |
| Temperature                       | 173.0(1) K                                       |                   |
| Wavelength                        | 0.71073 Å                                        |                   |
| Crystal system                    | Monoclinic                                       |                   |
| Space group                       | P 21                                             |                   |
| Unit cell dimensions              | a = 5.2341(2) Å                                  | α = 90°.          |
|                                   | b = 12.3751(5) Å                                 | β = 97.6880(10)°. |
|                                   | c = 14.2381(7) Å                                 | γ = 90°.          |
| Volume                            | 913.95(7) Å <sup>3</sup>                         |                   |
| Z                                 | 2                                                |                   |
| Density (calculated)              | 1.310 Mg/m <sup>3</sup>                          |                   |
| Absorption coefficient            | 0.210 mm <sup>-1</sup>                           |                   |
| F(000)                            | 384                                              |                   |
| Crystal size                      | 0.1 x 0.15 x 0.35 mm <sup>3</sup>                |                   |
| Theta range for data collection   | 2.89 to 25.04°.                                  |                   |
| Index ranges                      | -5 ≤ h ≤ 6, -14 ≤ k ≤ 13, -15 ≤ l ≤ 16           |                   |
| Reflections collected             | 5702                                             |                   |
| Independent reflections           | 3175 [R(int) = 0.0303]                           |                   |
| Completeness to theta = 25.04°    | 99.9 %                                           |                   |
| Absorption correction             | None                                             |                   |
| Refinement method                 | Full-matrix least-squares on F <sup>2</sup>      |                   |
| Data / restraints / parameters    | 3175 / 1 / 222                                   |                   |
| Goodness-of-fit on F <sup>2</sup> | 1.021                                            |                   |
| Final R indices [I > 2σ(I)]       | R1 = 0.0435, wR2 = 0.1030                        |                   |
| R indices (all data)              | R1 = 0.0583, wR2 = 0.1099                        |                   |
| Absolute structure parameter      | -0.02(11)                                        |                   |
| Extinction coefficient            | 0.022(4)                                         |                   |
| Largest diff. peak and hole       | 0.533 and -0.348 e.Å <sup>-3</sup>               |                   |

**Table S2.** Atomic coordinates ( $\times 10^4$ ) and equivalent isotropic displacement parameters ( $\text{\AA}^2 \times 10^3$ ) for **7b**.  $U(\text{eq})$  is defined as one third of the trace of the orthogonalized  $U^{ij}$  tensor.

|       | x        | y        | z       | $U(\text{eq})$ |
|-------|----------|----------|---------|----------------|
| S(1)  | 6540(2)  | -1616(1) | 8052(1) | 59(1)          |
| O(14) | -1440(4) | 3948(2)  | 7239(2) | 33(1)          |
| O(8)  | 1122(4)  | 1345(2)  | 7909(2) | 30(1)          |
| O(13) | -780(4)  | 3186(2)  | 8691(2) | 36(1)          |
| O(11) | 4865(3)  | 1884(2)  | 7464(2) | 33(1)          |
| O(20) | 1871(4)  | 3407(2)  | 5536(1) | 34(1)          |
| O(19) | 3884(5)  | 1799(2)  | 5533(2) | 52(1)          |
| O(4)  | 3131(6)  | 541(2)   | 9959(2) | 66(1)          |
| C(9)  | 444(5)   | 2249(2)  | 7324(2) | 26(1)          |
| C(12) | -682(5)  | 3159(2)  | 7855(2) | 26(1)          |
| C(18) | 3024(5)  | 2535(2)  | 5944(2) | 27(1)          |
| C(10) | 3050(5)  | 2614(2)  | 7002(2) | 25(1)          |
| C(7)  | 3777(5)  | 1475(3)  | 8254(2) | 31(1)          |
| C(21) | 1355(5)  | 3441(3)  | 4502(2) | 34(1)          |
| C(3)  | 5109(6)  | 424(3)   | 8556(2) | 35(1)          |
| C(15) | -2257(6) | 4984(3)  | 7605(2) | 33(1)          |
| C(4)  | 4412(7)  | 23(3)    | 9487(2) | 42(1)          |
| C(16) | 70(7)    | 5611(3)  | 8039(3) | 47(1)          |
| C(6)  | 5227(10) | -1952(3) | 9125(3) | 65(1)          |
| C(23) | 1195(8)  | 4636(3)  | 4260(3) | 52(1)          |
| C(22) | -1071(7) | 2838(3)  | 4181(3) | 53(1)          |
| C(2)  | 4587(8)  | -428(3)  | 7782(3) | 50(1)          |
| C(5)  | 5545(10) | -1055(3) | 9835(3) | 60(1)          |
| C(17) | -3736(7) | 5537(3)  | 6760(3) | 45(1)          |

**Table S3.** Bond lengths [ $\text{\AA}$ ] and angles [ $^\circ$ ] for **7b**.

---

|                   |          |
|-------------------|----------|
| S(1)-C(2)         | 1.802(4) |
| S(1)-C(6)         | 1.805(5) |
| O(14)-C(12)       | 1.337(4) |
| O(14)-C(15)       | 1.469(4) |
| O(8)-C(9)         | 1.411(3) |
| O(8)-C(7)         | 1.419(4) |
| O(13)-C(12)       | 1.198(4) |
| O(11)-C(10)       | 1.408(3) |
| O(11)-C(7)        | 1.420(4) |
| O(20)-C(18)       | 1.331(4) |
| O(20)-C(21)       | 1.460(4) |
| O(19)-C(18)       | 1.202(4) |
| O(4)-C(4)         | 1.197(4) |
| C(9)-C(12)        | 1.519(4) |
| C(9)-C(10)        | 1.562(4) |
| C(18)-C(10)       | 1.509(4) |
| C(7)-C(3)         | 1.511(4) |
| C(21)-C(22)       | 1.491(5) |
| C(21)-C(23)       | 1.519(5) |
| C(3)-C(4)         | 1.505(5) |
| C(3)-C(2)         | 1.523(5) |
| C(15)-C(17)       | 1.504(5) |
| C(15)-C(16)       | 1.505(5) |
| C(4)-C(5)         | 1.517(5) |
| C(6)-C(5)         | 1.495(6) |
|                   |          |
| C(2)-S(1)-C(6)    | 95.7(2)  |
| C(12)-O(14)-C(15) | 118.7(2) |
| C(9)-O(8)-C(7)    | 105.8(2) |
| C(10)-O(11)-C(7)  | 106.3(2) |
| C(18)-O(20)-C(21) | 118.3(2) |
| O(8)-C(9)-C(12)   | 112.2(2) |
| O(8)-C(9)-C(10)   | 104.0(2) |
| C(12)-C(9)-C(10)  | 110.1(2) |
| O(13)-C(12)-O(14) | 125.7(3) |
| O(13)-C(12)-C(9)  | 125.9(3) |

|                   |          |
|-------------------|----------|
| O(14)-C(12)-C(9)  | 108.4(2) |
| O(19)-C(18)-O(20) | 125.4(3) |
| O(19)-C(18)-C(10) | 125.5(3) |
| O(20)-C(18)-C(10) | 109.1(2) |
| O(11)-C(10)-C(18) | 109.9(2) |
| O(11)-C(10)-C(9)  | 103.8(2) |
| C(18)-C(10)-C(9)  | 112.5(2) |
| O(8)-C(7)-O(11)   | 104.1(2) |
| O(8)-C(7)-C(3)    | 113.2(3) |
| O(11)-C(7)-C(3)   | 108.3(2) |
| O(20)-C(21)-C(22) | 109.3(3) |
| O(20)-C(21)-C(23) | 104.7(3) |
| C(22)-C(21)-C(23) | 113.5(3) |
| C(4)-C(3)-C(7)    | 112.2(3) |
| C(4)-C(3)-C(2)    | 111.6(3) |
| C(7)-C(3)-C(2)    | 111.0(3) |
| O(14)-C(15)-C(17) | 104.9(3) |
| O(14)-C(15)-C(16) | 109.7(2) |
| C(17)-C(15)-C(16) | 113.3(3) |
| O(4)-C(4)-C(3)    | 122.6(3) |
| O(4)-C(4)-C(5)    | 120.8(3) |
| C(3)-C(4)-C(5)    | 116.5(3) |
| C(5)-C(6)-S(1)    | 112.4(3) |
| C(3)-C(2)-S(1)    | 111.6(2) |
| C(6)-C(5)-C(4)    | 115.4(3) |

---

Symmetry transformations used to generate equivalent atoms:

**Table S4.** Anisotropic displacement parameters ( $\text{\AA}^2 \times 10^3$ ) for **7b**. The anisotropic displacement factor exponent takes the form:  $-2\pi^2 [ h^2 a^{*2} U^{11} + \dots + 2 h k a^* b^* U^{12} ]$

|       | U <sup>11</sup> | U <sup>22</sup> | U <sup>33</sup> | U <sup>23</sup> | U <sup>13</sup> | U <sup>12</sup> |
|-------|-----------------|-----------------|-----------------|-----------------|-----------------|-----------------|
| S(1)  | 90(1)           | 41(1)           | 46(1)           | 0(1)            | 11(1)           | 32(1)           |
| O(14) | 40(1)           | 24(1)           | 36(1)           | 3(1)            | 11(1)           | 8(1)            |
| O(8)  | 32(1)           | 19(1)           | 42(1)           | 4(1)            | 10(1)           | 3(1)            |
| O(13) | 45(1)           | 35(1)           | 29(1)           | 0(1)            | 5(1)            | 7(1)            |
| O(11) | 23(1)           | 39(1)           | 36(1)           | 14(1)           | 5(1)            | 8(1)            |
| O(20) | 38(1)           | 35(1)           | 29(1)           | 7(1)            | 4(1)            | 9(1)            |
| O(19) | 70(2)           | 48(2)           | 39(2)           | 4(1)            | 14(1)           | 29(1)           |
| O(4)  | 113(2)          | 46(2)           | 45(2)           | 7(1)            | 36(2)           | 27(2)           |
| C(9)  | 24(1)           | 23(2)           | 32(2)           | 1(1)            | 6(1)            | 1(1)            |
| C(12) | 24(1)           | 22(2)           | 34(2)           | 1(1)            | 4(1)            | -1(1)           |
| C(18) | 23(1)           | 29(2)           | 30(2)           | 3(1)            | 4(1)            | -1(1)           |
| C(10) | 22(1)           | 21(2)           | 32(2)           | 3(1)            | 2(1)            | 0(1)            |
| C(7)  | 30(2)           | 34(2)           | 30(2)           | 5(1)            | 4(1)            | 7(1)            |
| C(21) | 30(2)           | 42(2)           | 29(2)           | 5(2)            | 2(1)            | 2(2)            |
| C(3)  | 44(2)           | 29(2)           | 33(2)           | 4(2)            | 5(1)            | 9(1)            |
| C(15) | 35(2)           | 24(2)           | 44(2)           | -1(1)           | 14(1)           | 6(1)            |
| C(4)  | 57(2)           | 38(2)           | 29(2)           | 1(2)            | 6(2)            | 11(2)           |
| C(16) | 45(2)           | 30(2)           | 65(3)           | -6(2)           | 2(2)            | 3(2)            |
| C(6)  | 97(3)           | 28(2)           | 73(3)           | 15(2)           | 23(3)           | 11(2)           |
| C(23) | 60(2)           | 48(2)           | 47(2)           | 15(2)           | -2(2)           | -7(2)           |
| C(22) | 47(2)           | 53(2)           | 55(2)           | 13(2)           | -9(2)           | -10(2)          |
| C(2)  | 67(2)           | 44(2)           | 37(2)           | -3(2)           | -3(2)           | 14(2)           |
| C(5)  | 95(3)           | 44(2)           | 45(2)           | 11(2)           | 21(2)           | 19(2)           |
| C(17) | 48(2)           | 29(2)           | 60(2)           | 9(2)            | 9(2)            | 5(2)            |

**Table S5.** Torsion angles [°] for **7b**.

---

|                         |           |
|-------------------------|-----------|
| C(7)-O(8)-C(9)-C(12)    | -94.4(3)  |
| C(7)-O(8)-C(9)-C(10)    | 24.5(3)   |
| C(15)-O(14)-C(12)-O(13) | 5.8(4)    |
| C(15)-O(14)-C(12)-C(9)  | -171.4(2) |
| O(8)-C(9)-C(12)-O(13)   | 7.2(4)    |
| C(10)-C(9)-C(12)-O(13)  | -108.1(3) |
| O(8)-C(9)-C(12)-O(14)   | -175.6(2) |
| C(10)-C(9)-C(12)-O(14)  | 69.1(3)   |
| C(21)-O(20)-C(18)-O(19) | 6.6(4)    |
| C(21)-O(20)-C(18)-C(10) | -172.8(2) |
| C(7)-O(11)-C(10)-C(18)  | -143.1(2) |
| C(7)-O(11)-C(10)-C(9)   | -22.6(3)  |
| O(19)-C(18)-C(10)-O(11) | 17.5(4)   |
| O(20)-C(18)-C(10)-O(11) | -163.1(2) |
| O(19)-C(18)-C(10)-C(9)  | -97.6(3)  |
| O(20)-C(18)-C(10)-C(9)  | 81.8(3)   |
| O(8)-C(9)-C(10)-O(11)   | -1.2(3)   |
| C(12)-C(9)-C(10)-O(11)  | 119.1(3)  |
| O(8)-C(9)-C(10)-C(18)   | 117.5(2)  |
| C(12)-C(9)-C(10)-C(18)  | -122.2(3) |
| C(9)-O(8)-C(7)-O(11)    | -39.5(3)  |
| C(9)-O(8)-C(7)-C(3)     | -156.9(2) |
| C(10)-O(11)-C(7)-O(8)   | 38.8(3)   |
| C(10)-O(11)-C(7)-C(3)   | 159.6(2)  |
| C(18)-O(20)-C(21)-C(22) | 82.3(3)   |
| C(18)-O(20)-C(21)-C(23) | -155.8(3) |
| O(8)-C(7)-C(3)-C(4)     | -74.8(4)  |
| O(11)-C(7)-C(3)-C(4)    | 170.3(3)  |
| O(8)-C(7)-C(3)-C(2)     | 50.8(4)   |
| O(11)-C(7)-C(3)-C(2)    | -64.1(3)  |
| C(12)-O(14)-C(15)-C(17) | -162.6(2) |
| C(12)-O(14)-C(15)-C(16) | 75.4(3)   |
| C(7)-C(3)-C(4)-O(4)     | -6.2(5)   |
| C(2)-C(3)-C(4)-O(4)     | -131.5(4) |
| C(7)-C(3)-C(4)-C(5)     | 177.2(3)  |
| C(2)-C(3)-C(4)-C(5)     | 51.9(4)   |

|                     |          |
|---------------------|----------|
| C(2)-S(1)-C(6)-C(5) | -57.8(4) |
| C(4)-C(3)-C(2)-S(1) | -62.9(4) |
| C(7)-C(3)-C(2)-S(1) | 171.2(2) |
| C(6)-S(1)-C(2)-C(3) | 61.8(3)  |
| S(1)-C(6)-C(5)-C(4) | 56.1(5)  |
| O(4)-C(4)-C(5)-C(6) | 133.8(4) |
| C(3)-C(4)-C(5)-C(6) | -49.5(5) |

---

Symmetry transformations used to generate equivalent atoms:
